# Supplementary material for: Three-dimensional intestinal villi epithelium enhances protection of human intestinal cells from bacterial infection by inducing mucin expression
Source: Royal Society of Chemistry journal article supplement (doi:10.1039/c4ib00157e), 2014-08-28
Supplement: c4ib00157e1.pdf [file c4ib00157e1.pdf]

**Three-dimensional intestinal villi epithelium enhances protection from bacterial infection by  
inducing MUC17 expression**

Supplementary Information

Si Hyun Kim <sup>a</sup>, Meiyong Chi <sup>b</sup>, Banya Yi <sup>a</sup>, So Hyun Kim <sup>b</sup>, Seunghan Oh <sup>b</sup>, Younghoon Kim <sup>c</sup>, Sungsu Park <sup>d\*</sup>,

Jong Hwan Sung <sup>a\*\*</sup>

<sup>a</sup> Department of Chemical Engineering, Hongik University, Seoul, Korea

<sup>b</sup> Department of Chemistry and Nano Sciences (BK21 plus), Global Top 5 Program, Ewha Womans University, Seoul, Korea

<sup>c</sup> Department of Animal Science, Chonbuk National University, Jeonju, Korea

<sup>d</sup> School of Mechanical Engineering, Sungkyunkwan University, Suwon, Korea

\*corresponding author

\*\*corresponding author

Email address: nanosingapore@gmail.com (S. Park), jhsung22@hongik.ac.kr (J. H. Sung)

## Transcriptome analysis of Caco-2 cells on the 3D villi scaffold

Transcriptome of Caco-2 cells grown in a petri dish and on the 3D villi scaffold was analyzed. Among the 34,127 genes, the number of genes that were up-regulated more than 2-fold was 1,612 (4.7%), whereas the number of genes that were down-regulated more than 2-fold was 2,368 (6.9%). In both cases, p-value had to be less than 0.05 for the increase or decrease in gene expression to be considered statistically significant. The up-regulated groups of genes included genes related to immune response (7.9%), inflammatory response (7.3%), and cell migration (7.0%). The groups of genes that were down-regulated were related to DNA repair (22.4%), cell cycle (18.5%), and aging (14.4%). We further analyzed the expression levels of mucin gene family. The expression level of MUC13 increased 4-fold in the 3D cell culture model compared to the 2D monolayer culture. The expression level of MUC17 increased more than 7-fold, whereas the changes in the MUC1, MUC2, MUC4, and MUC6 expression level were less than 4-fold. The results of transcriptome analysis are summarized in Supplementary Fig. 1.

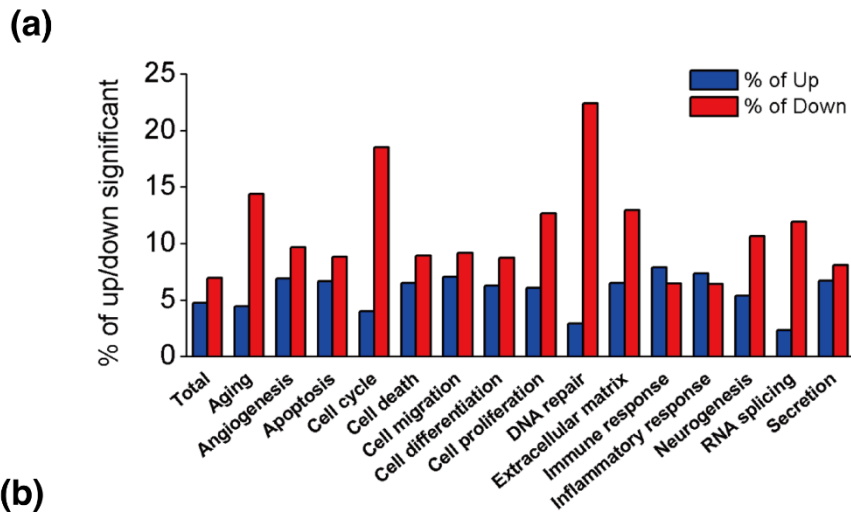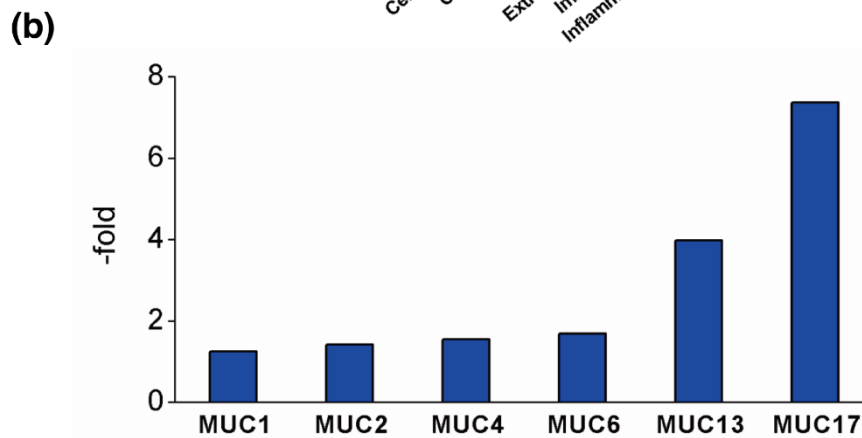

(c)

|                        | Total  | Aging | Angiogenesis | Apoptosis | Cell cycle | Cell death | Cell migration | Cell Differentiation | Cell Proliferation | DNA repair | Extracellular matrix | Immune response | Inflammatory response | Neurogenesis | RNA splicing | Secretion |
|------------------------|--------|-------|--------------|-----------|------------|------------|----------------|----------------------|--------------------|------------|----------------------|-----------------|-----------------------|--------------|--------------|-----------|
| Gene Number            | 34,127 | 271   | 434          | 1,980     | 1,728      | 2,205      | 995            | 3,229                | 1,887              | 482        | 540                  | 1,259           | 560                   | 1,418        | 386          | 954       |
| % of Total             | 100.0  | 0.8   | 1.3          | 5.8       | 5.1        | 6.5        | 2.9            | 9.5                  | 5.5                | 1.4        | 1.6                  | 3.7             | 1.6                   | 4.2          | 1.1          | 2.8       |
| Up Significant         | 1,612  | 12    | 30           | 132       | 69         | 143        | 70             | 202                  | 114                | 14         | 35                   | 99              | 41                    | 76           | 9            | 64        |
| % of Up Significant    | 4.7    | 4.4   | 6.9          | 6.7       | 4.0        | 6.5        | 7.0            | 6.3                  | 6.0                | 2.9        | 6.5                  | 7.9             | 7.3                   | 5.4          | 2.3          | 6.7       |
| Dn Significant         | 2,368  | 39    | 42           | 175       | 320        | 197        | 91             | 281                  | 239                | 108        | 70                   | 81              | 36                    | 151          | 46           | 77        |
| % of Dn Significant    | 6.9    | 14.4  | 9.7          | 8.8       | 18.5       | 8.9        | 9.1            | 8.7                  | 12.7               | 22.4       | 13.0                 | 6.4             | 6.4                   | 10.6         | 11.9         | 8.1       |
| Total Significant      | 3,980  | 51    | 72           | 307       | 389        | 340        | 161            | 483                  | 353                | 122        | 105                  | 180             | 77                    | 227          | 55           | 141       |
| % of Total Significant | 11.7   | 18.8  | 16.6         | 15.5      | 22.5       | 15.4       | 16.2           | 15.0                 | 18.7               | 25.3       | 19.4                 | 14.3            | 13.8                  | 16.0         | 14.2         | 14.8      |

**Supplementary Fig. 1 Whole-transcriptome analysis.** (a) Fraction of genes that were up- or down-regulated in 3D model compared to 2D model. (b) Fold increase of MUC gene family members. (c) Whole-transcriptome analysis of 3D model in comparison to the 2D model (Significance criteria: 2 fold, p-value < 0.05).

E.coli infection study

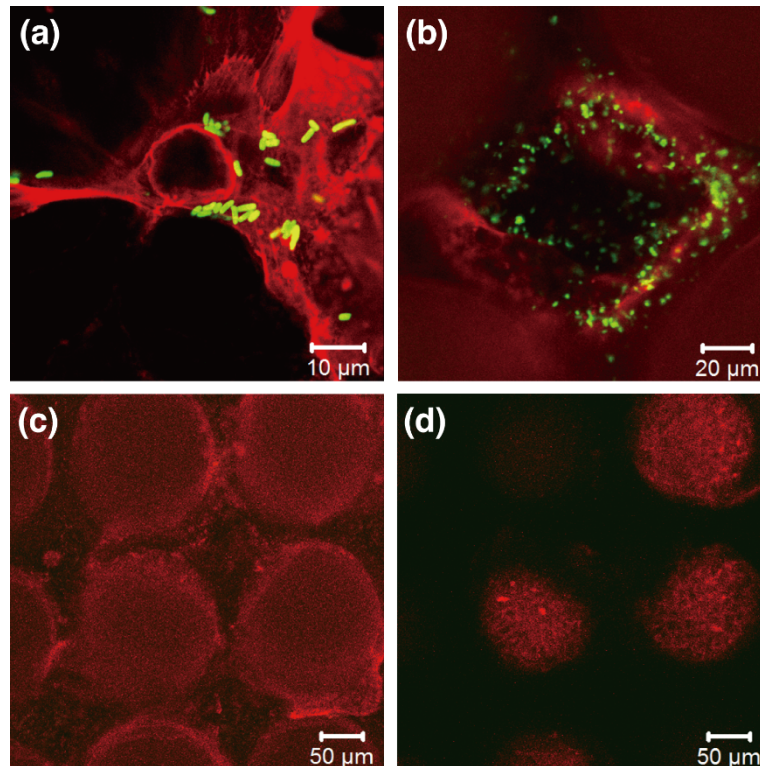

**Supplementary Fig. 2 Infectivity of *E. coli* O157:H7 in the 2D and 3D model.** Fluorescence image of bacteria-infected Caco-2 cells in (a) 2D culture (Day 4), (b) 3D culture (Day 4, bottom), (c) 3D culture (Day 20, bottom), (d) 3D culture (Day 20, top) (Red: actin, Green: *E. coli* O157:H7).

Occludin expression in 2D Caco-2 cells

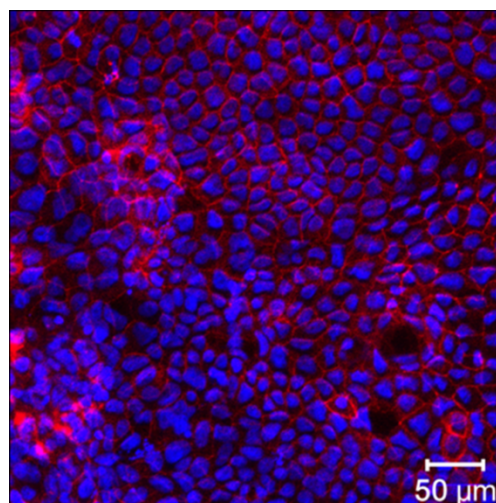

**Supplementary Fig. 3 Expression of occludin in 2D monolayer model** (Red: occludin, blue: DAPI).

Time course changes of TEER in 2D and 3D Caco-2 models

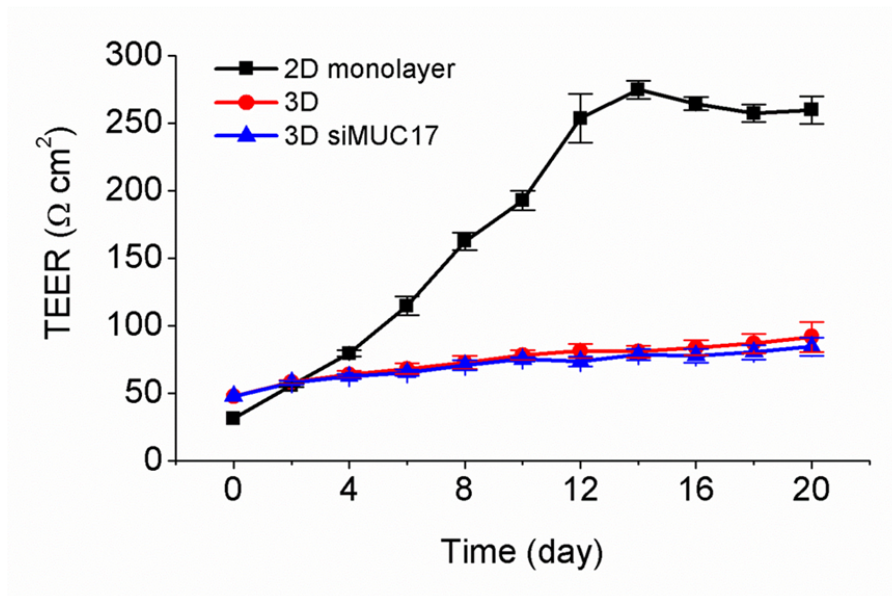

**Supplementary Fig. 4** Time-course change of TEER of Caco-2 cells in 2D monolayer, 3D villi scaffold, 3D villi scaffold treated with siMUC17.

Confocal cross-section images of Caco-2 cells on 3D villi model.

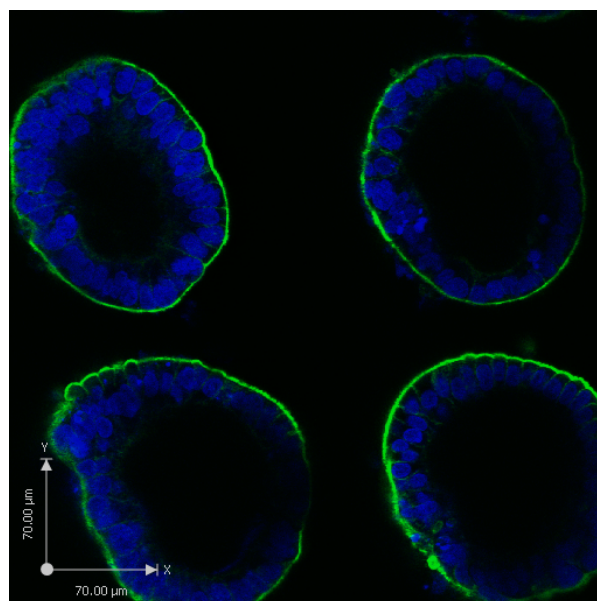

**Supplementary Fig. 5** Cross-section image (xy plane) of Caco-2 cells on 3D collagen villi, stained for actin (green) and nucleic acid (blue).
